# Supplementary material for: Graphene-decorated graphite–sulfur composite as a high-tap-density electrode for Li–S batteries
Source: Royal Society of Chemistry journal article supplement (doi:10.1039/c5ra04095g), 2015-01-01
Supplement: c5ra04095g1.pdf [file c5ra04095g1.pdf]

**Supporting Information**

**Low graphene containing C-S composite: The key to high tap-density Li/S  
battery**

Ganguli Babu and Leela Mohana Reddy Arava<sup>#</sup>

Department of Mechanical Engineering, Wayne State University, Detroit, MI 48202, USA

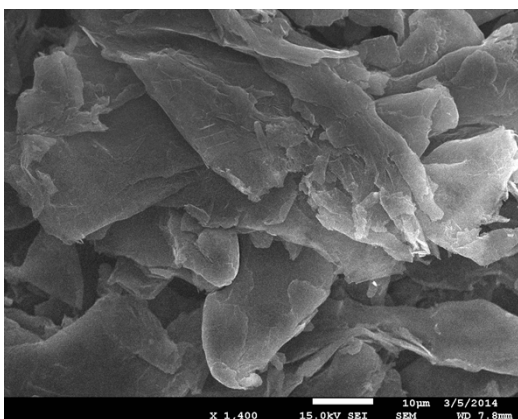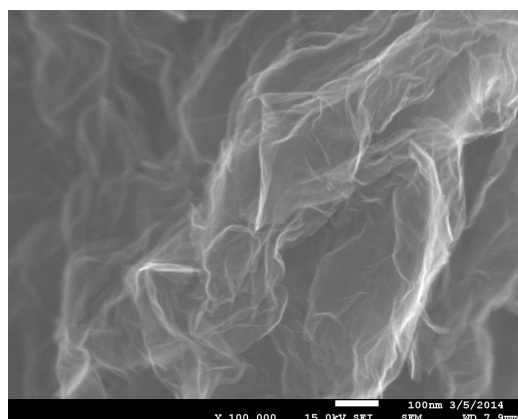

**Figure S1.** FE SEM images of graphite and few layer graphene used to prepare sulfur composite electrode for high volumetric energy density Li-S batteries

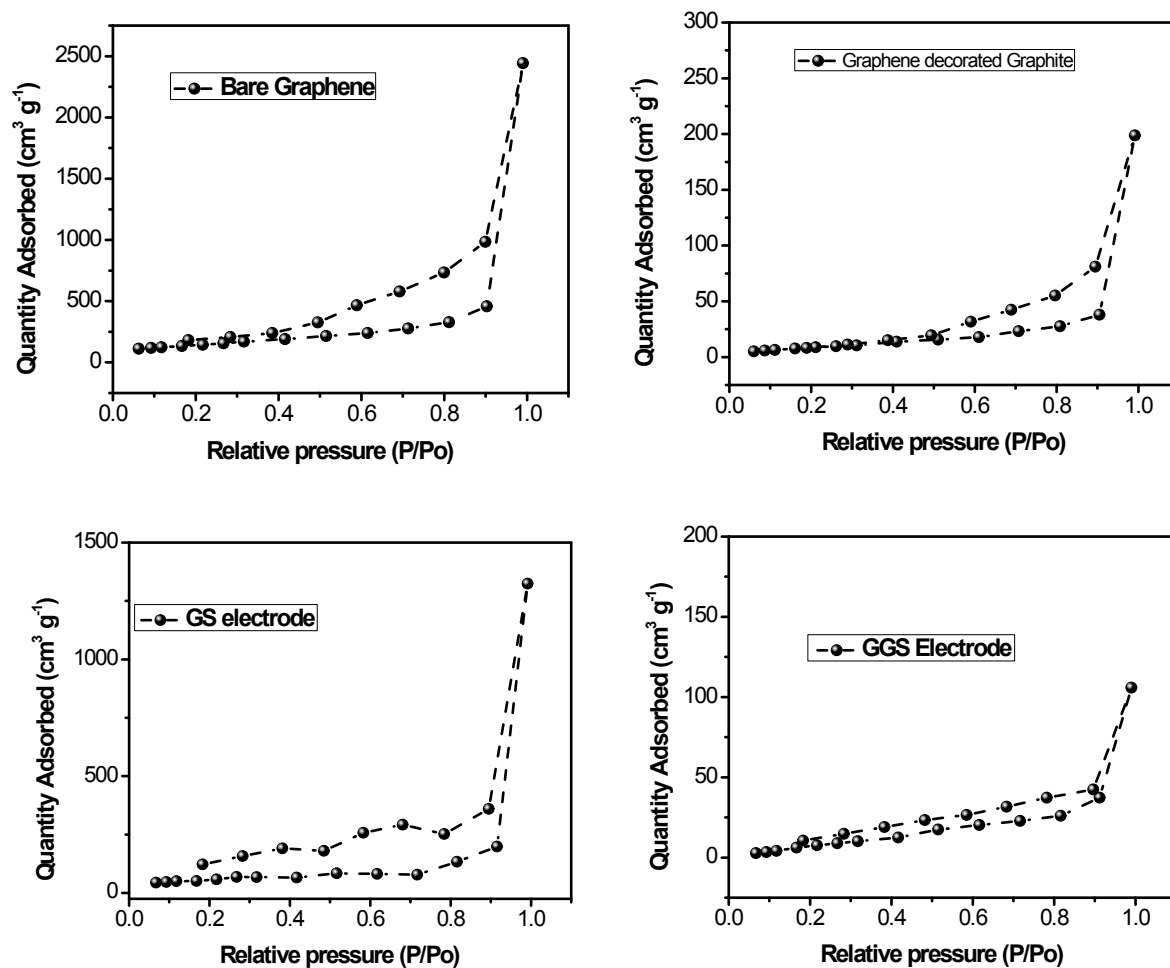

**Figure S2.** BET surface analysis of bare graphene, graphene - graphite matrix and their composites with sulfur respectively

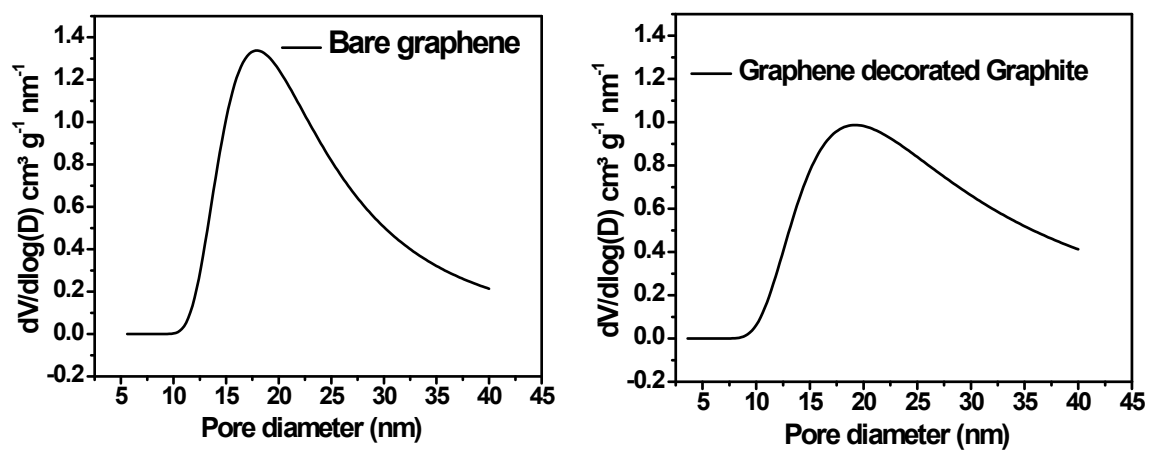

**Figure S3.** Pore size distribution of bare graphene (low tap-density) and graphene - graphite composite (high tap-density)

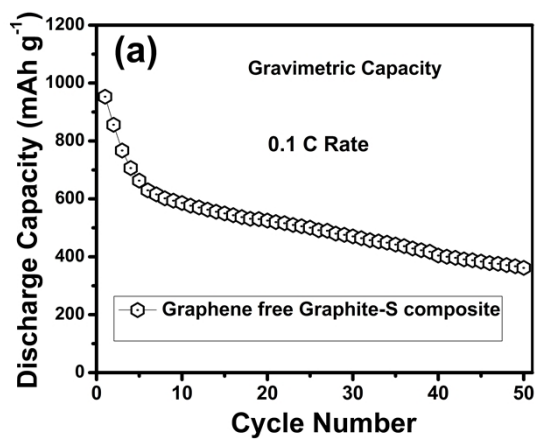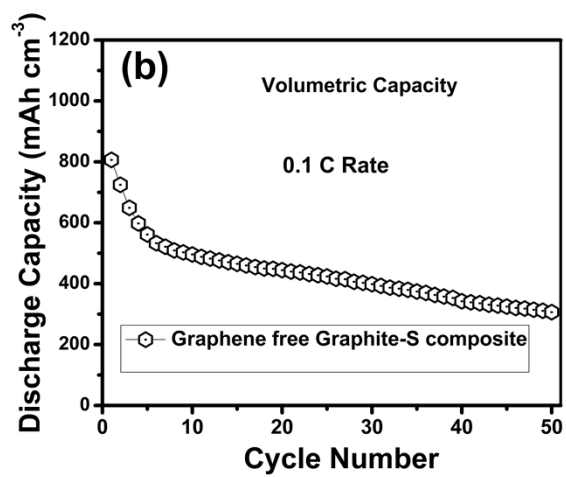

**Figure S4.** Electrochemical performance of graphene free graphite-sulfur composite a) gravimetric capacity ( $\text{mAh g}^{-1}$ ) and b) volumetric capacity ( $\text{mAh cm}^{-3}$ )

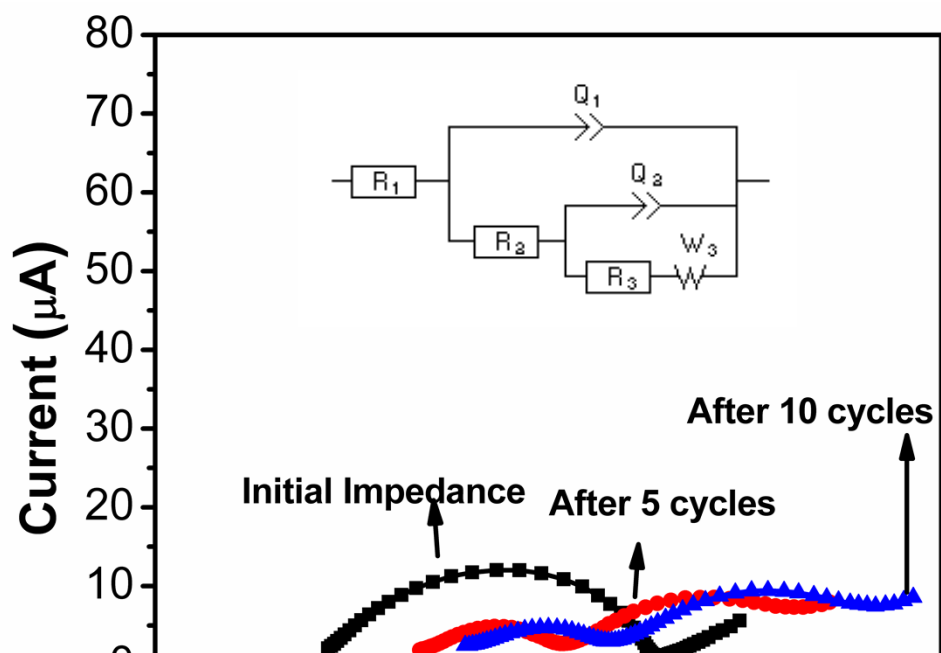

**Figure S5.** Electrochemical Impedance spectra of uncoated high density GGS electrode vs.  $\text{Li/Li}^+$
